# Supplementary material
Source: publisher figshare collection journal article supplement (https://frontiersin.figshare.com/ndownloader/files/11205266)
Supplement: Supplementary file [file 11205266]

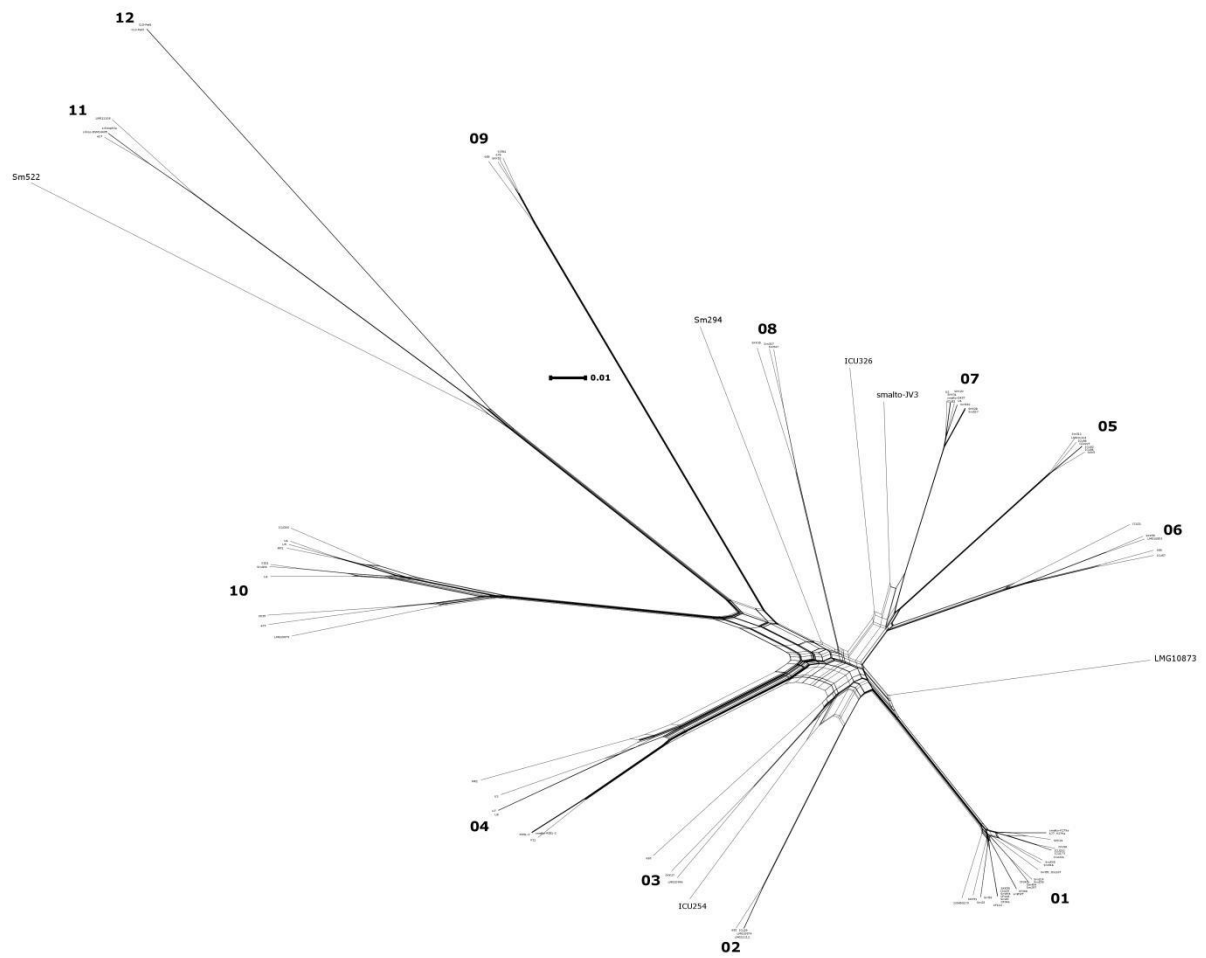

**Supplementary Fig 2.** NeighborNet splittree built from the 408,860 aligned SNP positions of the 94 *S. maltophilia* and *S. rhizophila* datasets using the program Splitstree4 with default settings. Groups as shown in Figure 1 are indicated.
